# Supplementary material
Source: MDPI journal article supplement (https://www.mdpi.com/2073-4441/14/1/20)
Supplement: s1 [file s1]

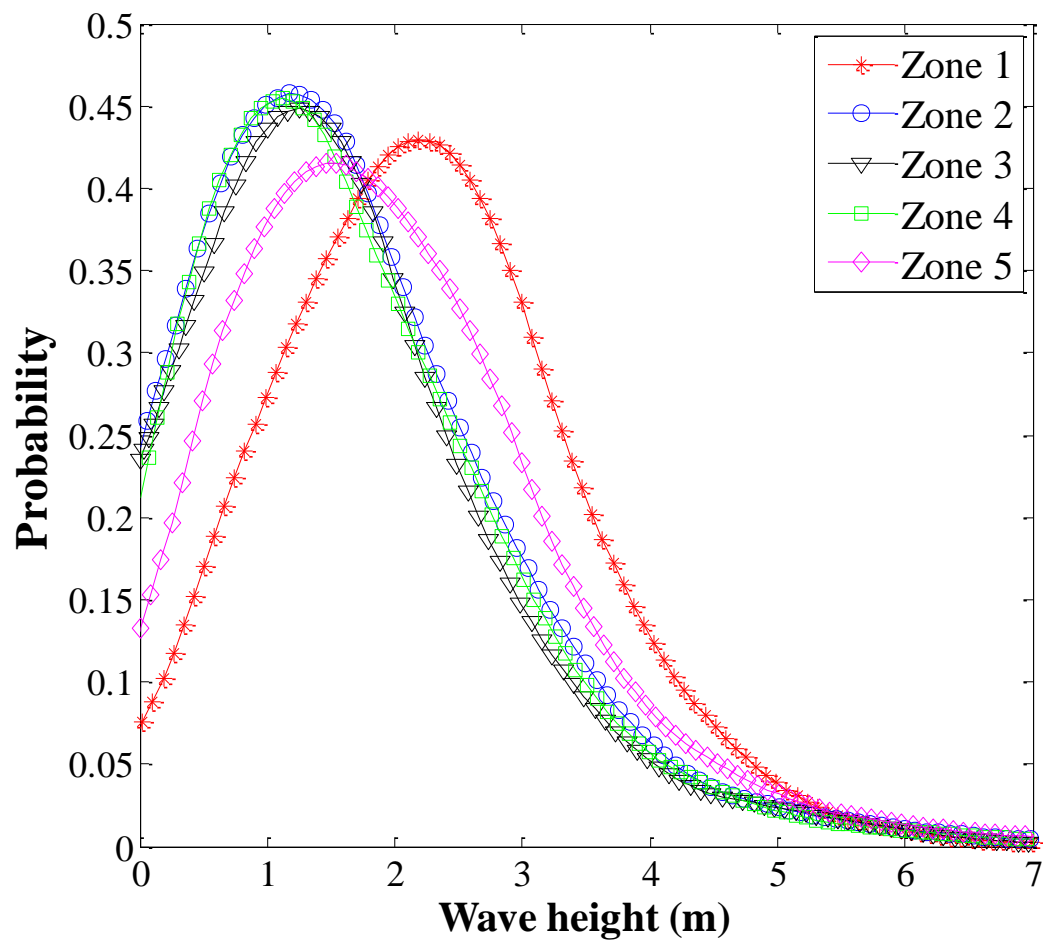

**Figure S1.** Wave height distributions for zones based on MC-TSAM.

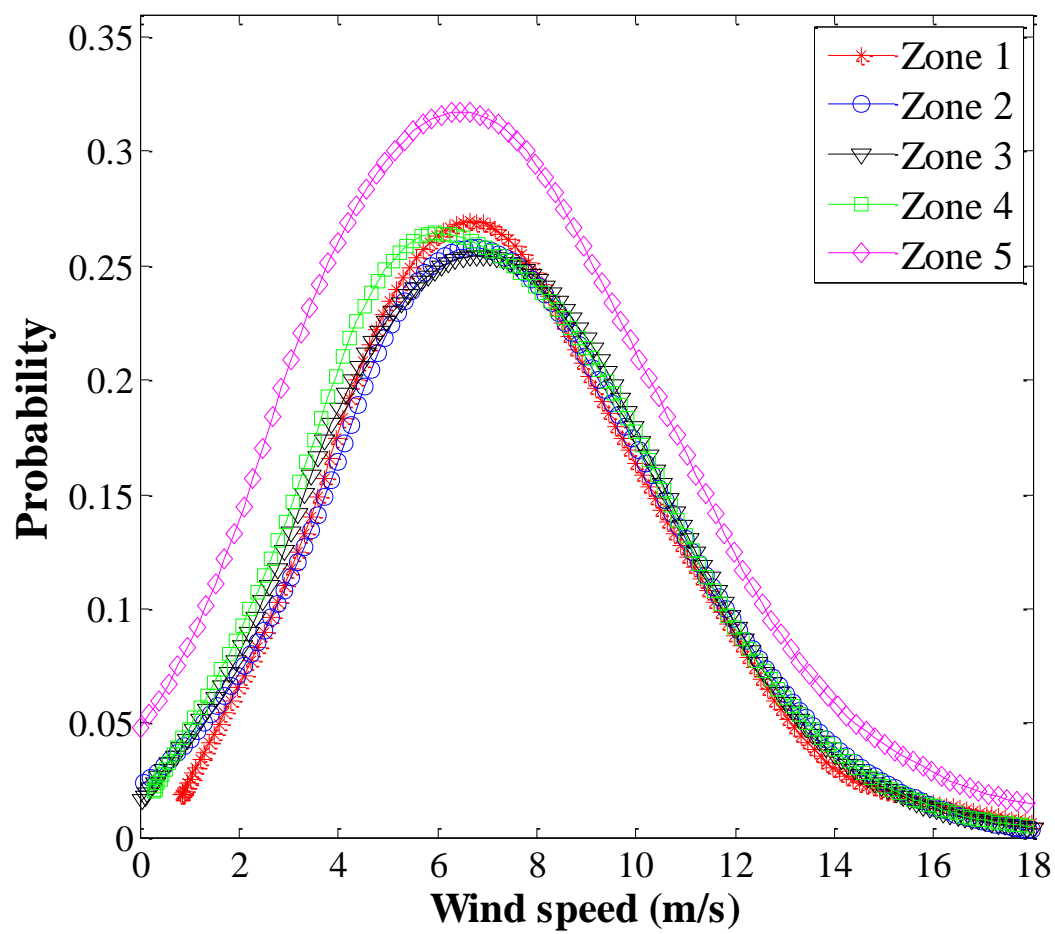

**Figure S2.** Wind speed distributions for zones based on MC-TSAM.

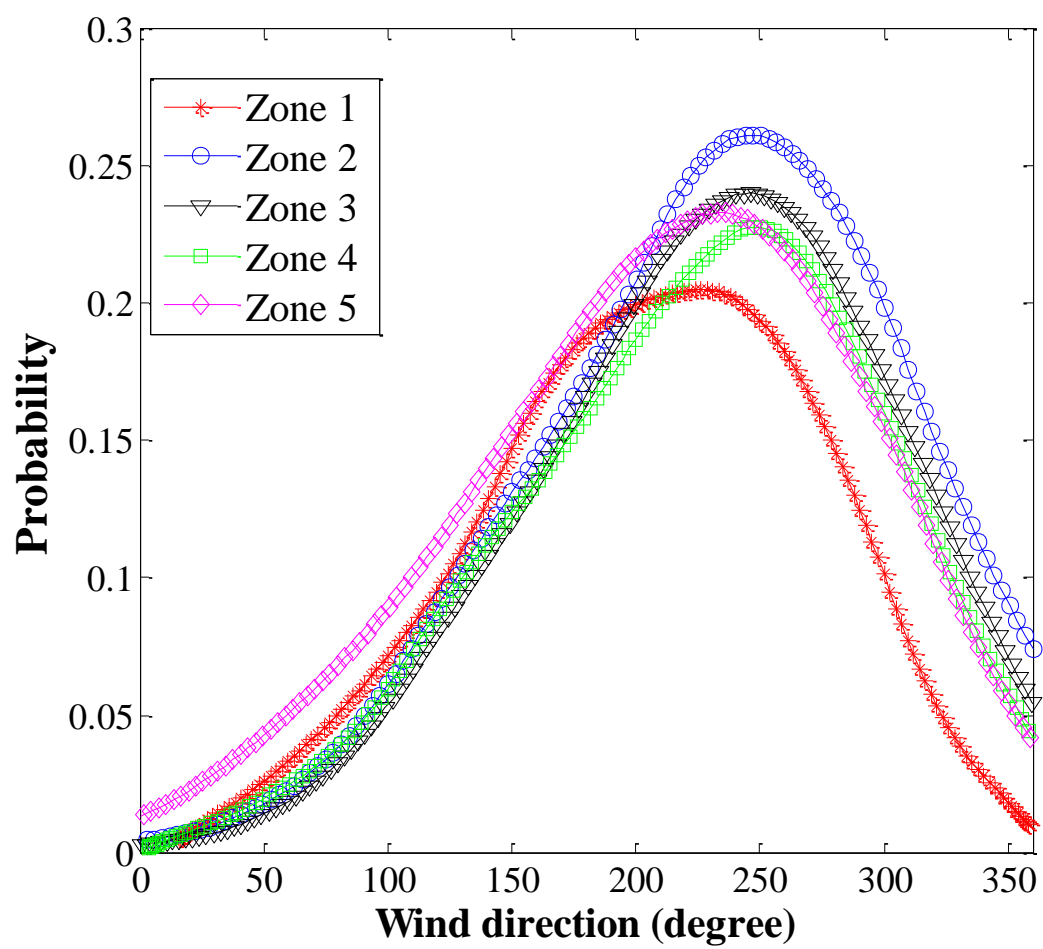

**Figure S3.** Wind direction distributions for zones based on MC-TSAM.

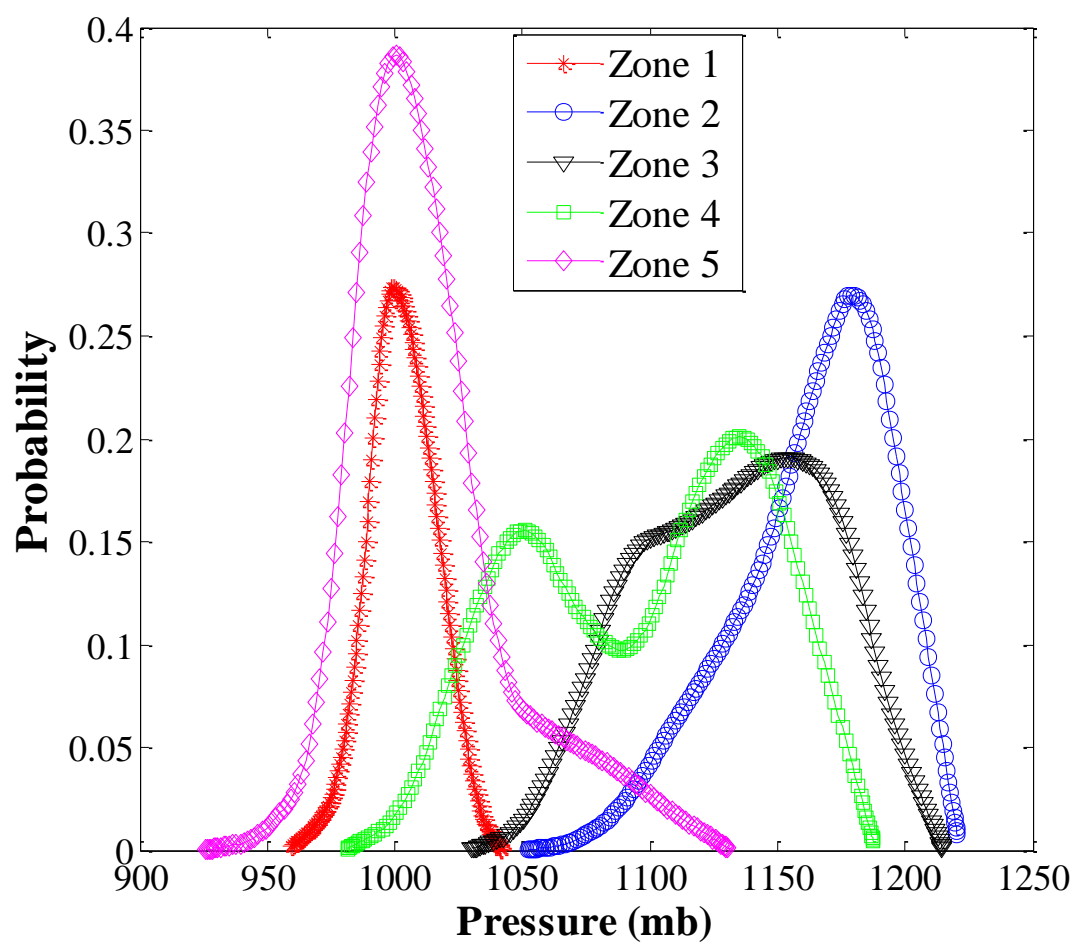

**Figure S4.** Pressure distributions for zones based on MC-TSAM.

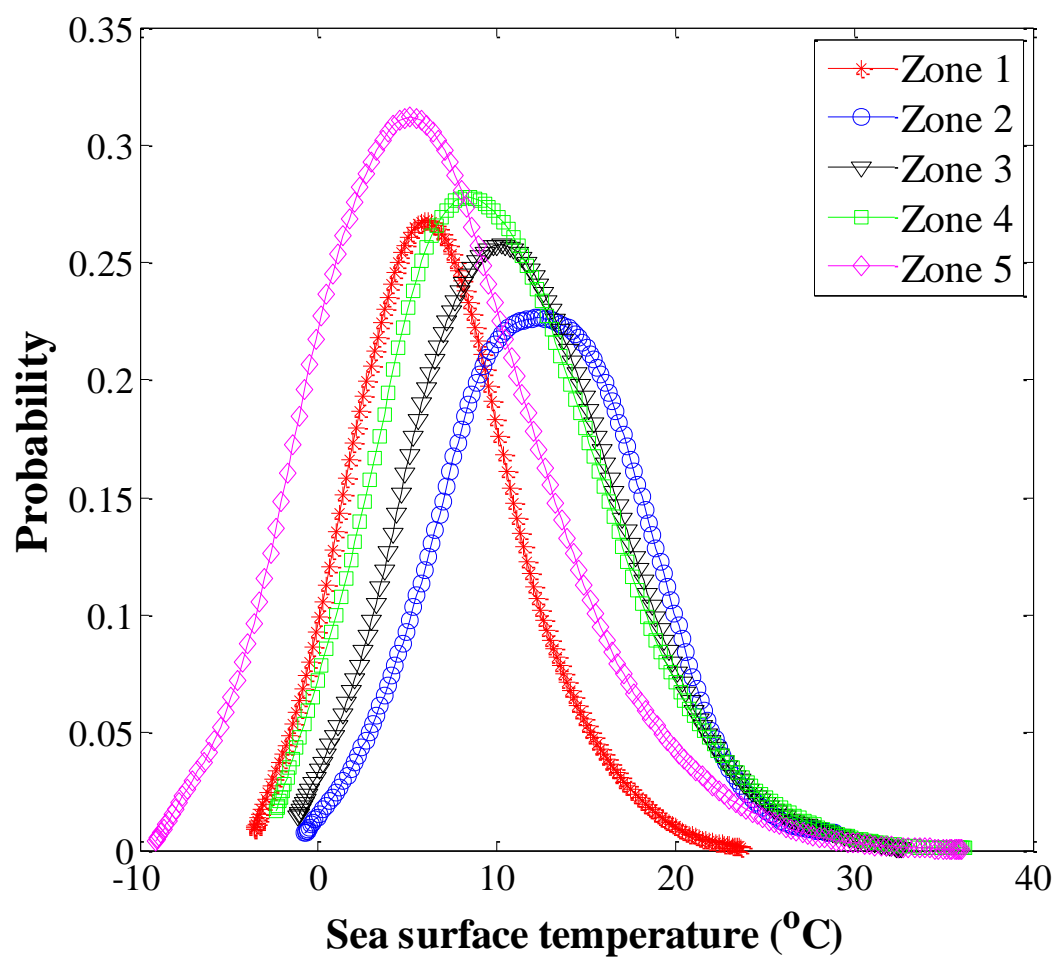

**Figure S5.** Seawater temperature distributions for zones based on MC-TSAM.

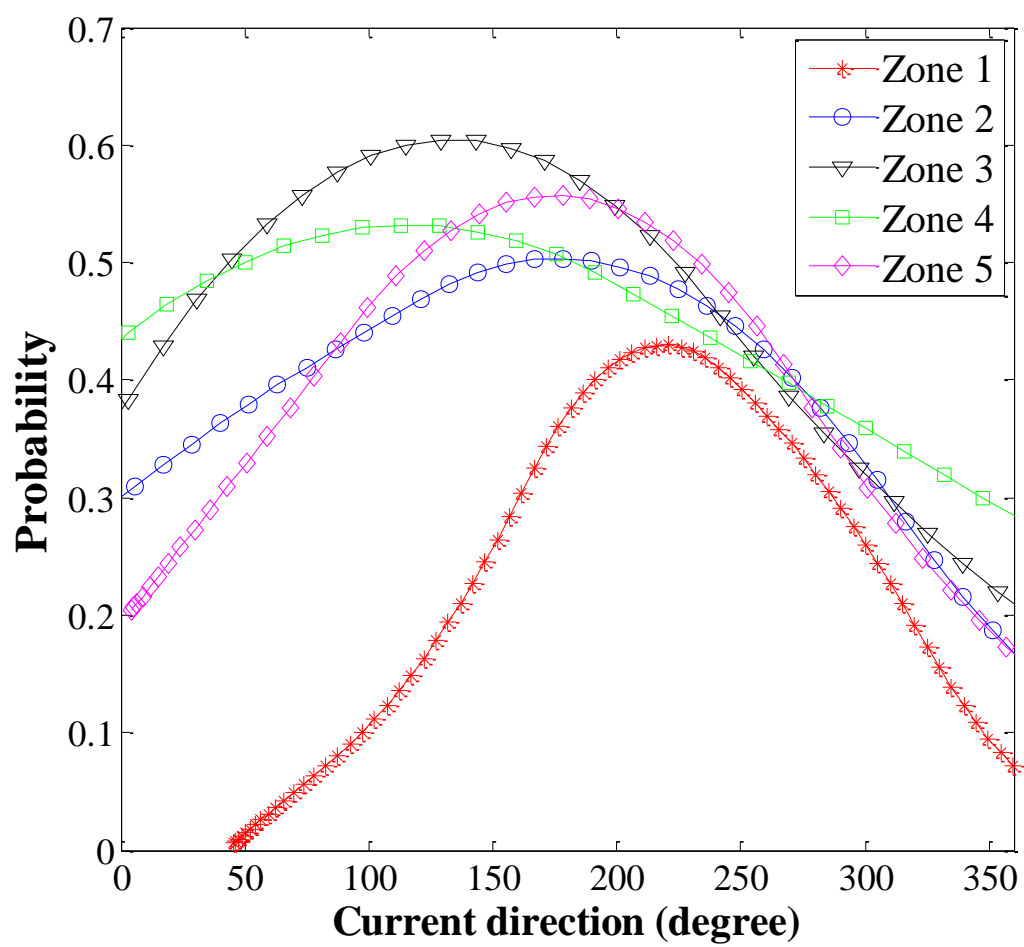

**Figure S6.** Current direction distributions for zones based on MC-TSAM.

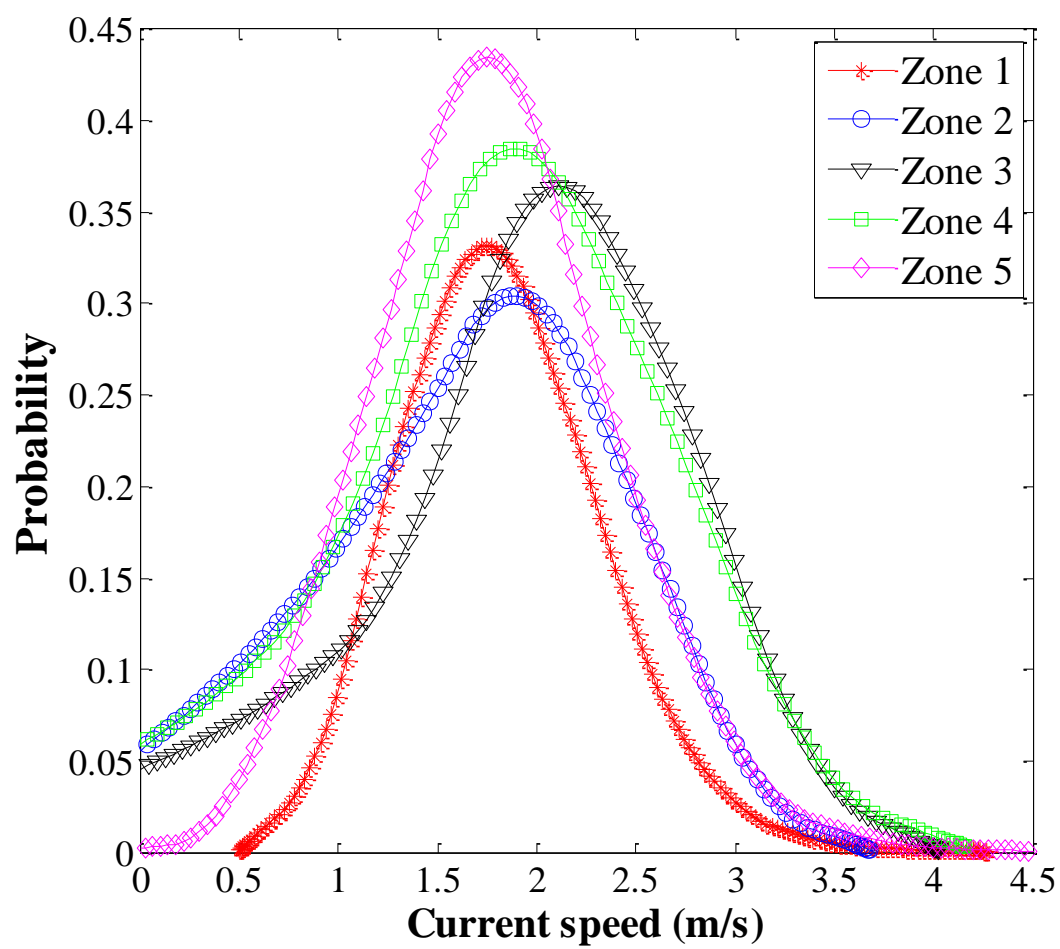

**Figure S7.** Current speed distributions for zones based on MC-TSAM.

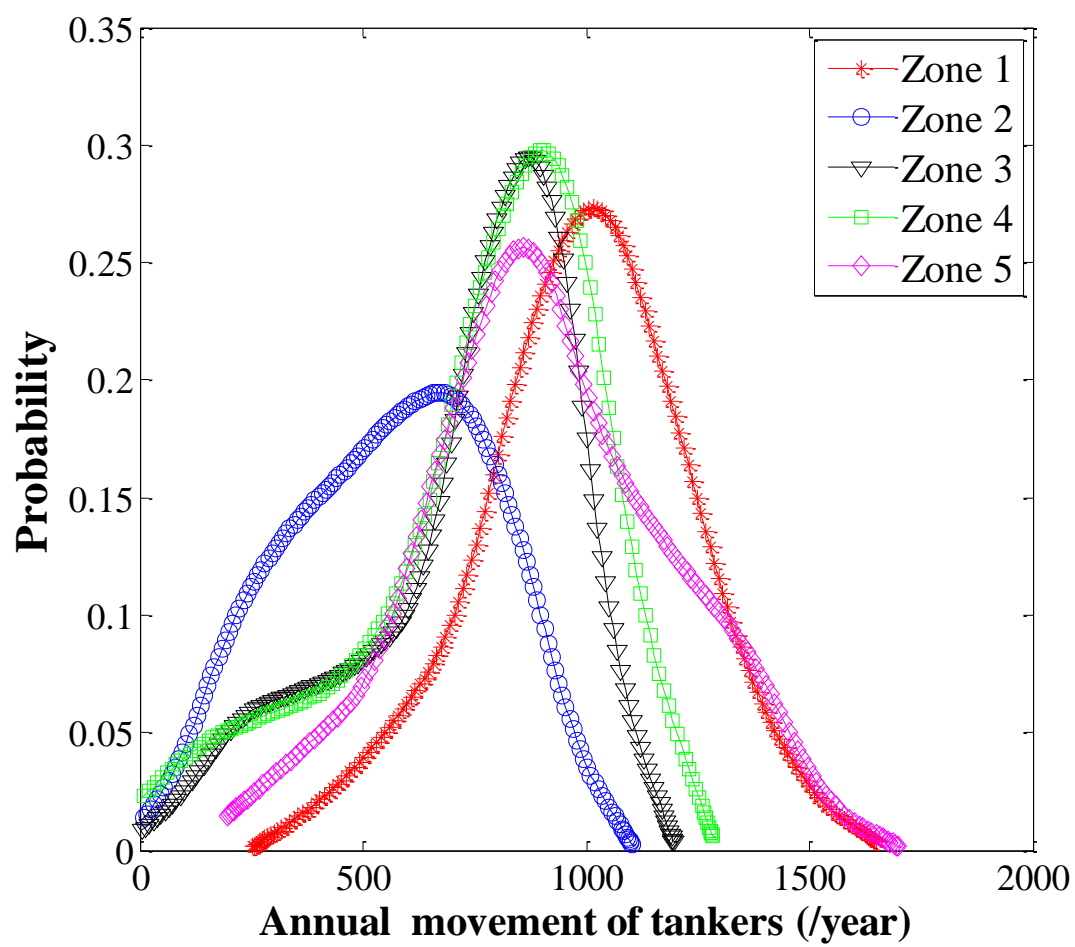

**Figure S8.** Tanker traffic density distributions for zones based on MC-TSAM.



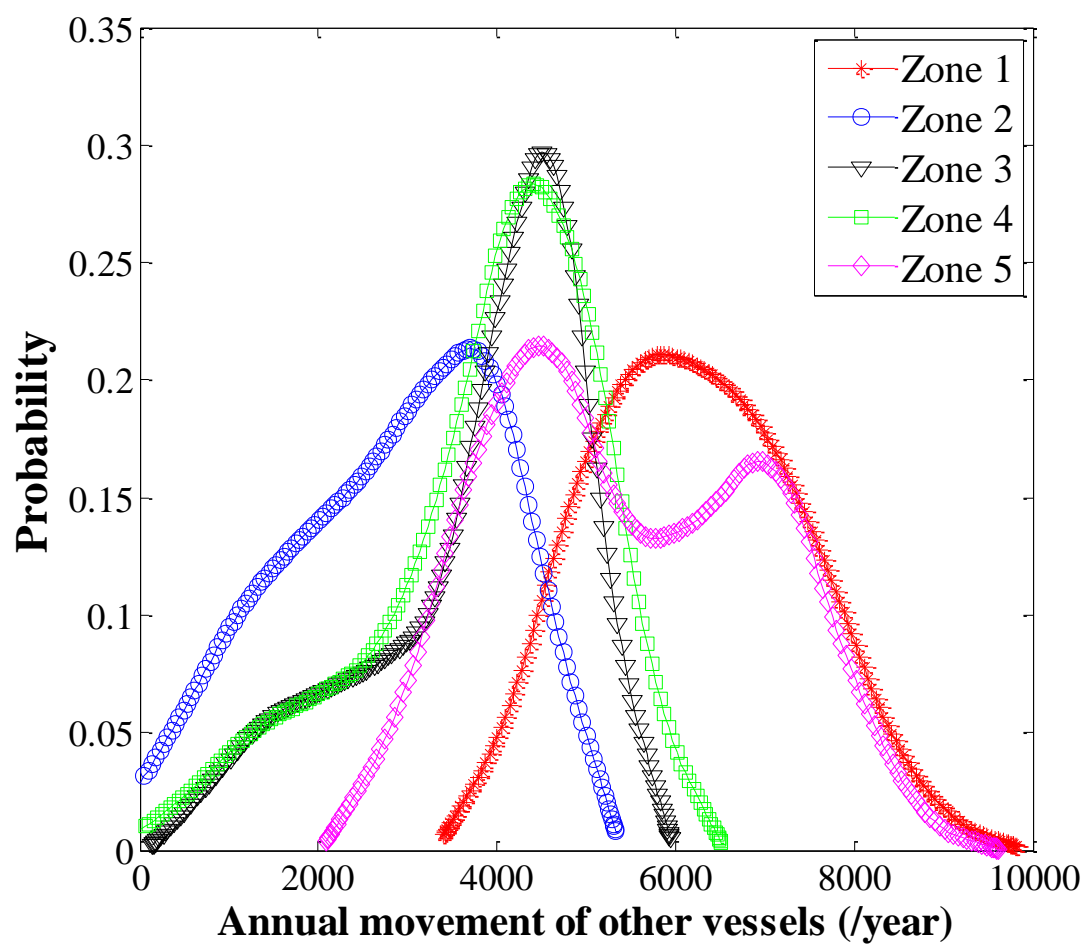

**Figure S9.** Other vessels traffic density distributions for zones based on MC-TSAM.

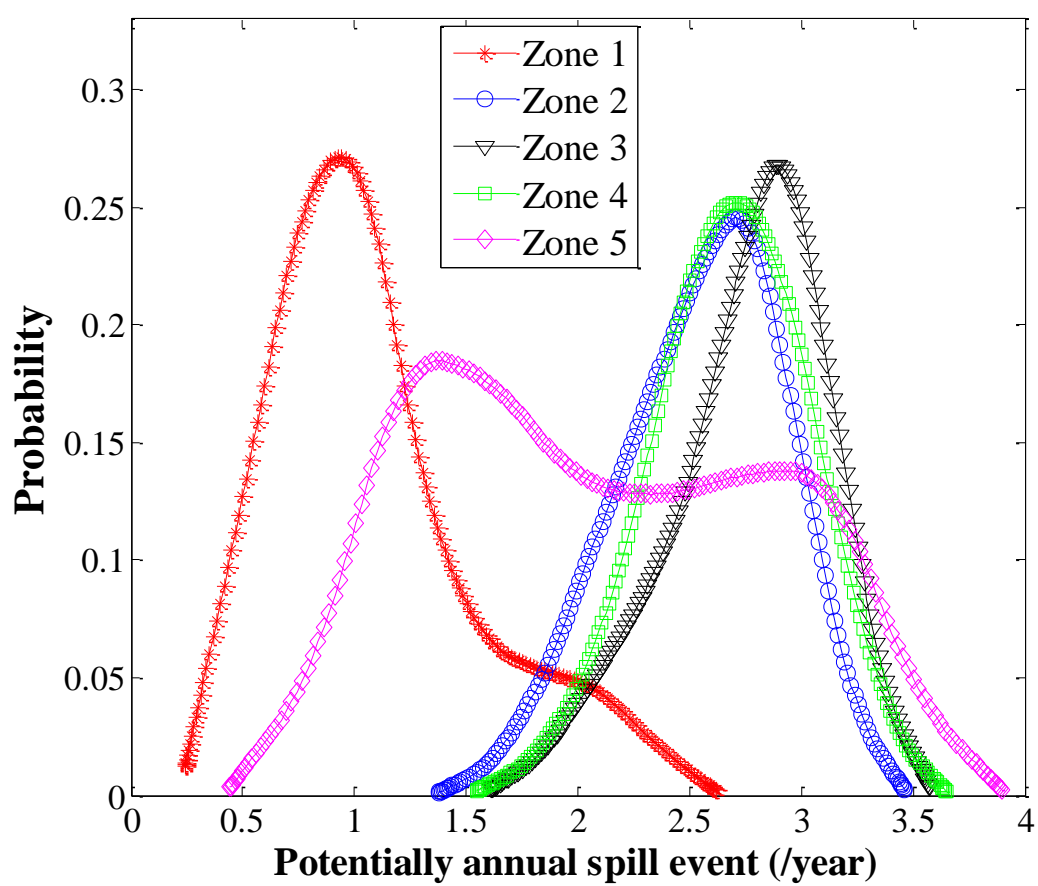

**Figure S10.** Oil spill frequency distributions for zones based on MC-TSAM.
